# Supplementary material for: Local Stratopause Temperature Variabilities and their Embedding in the Global Context
Source: Copernicus journal article supplement (doi:10.5194/angeo-2019-117), 2019-08-22

# Local Stratopause Temperature Variabilities and their Embedding in the Global Context: Supplementary Material

Ronald Eixmann, Vivien Matthias, Gerd Baumgarten, Michael Gerding and Josef Höffner

The following figures are similar to Figure 4 in the paper but for all available winter between 1981 and 2019.

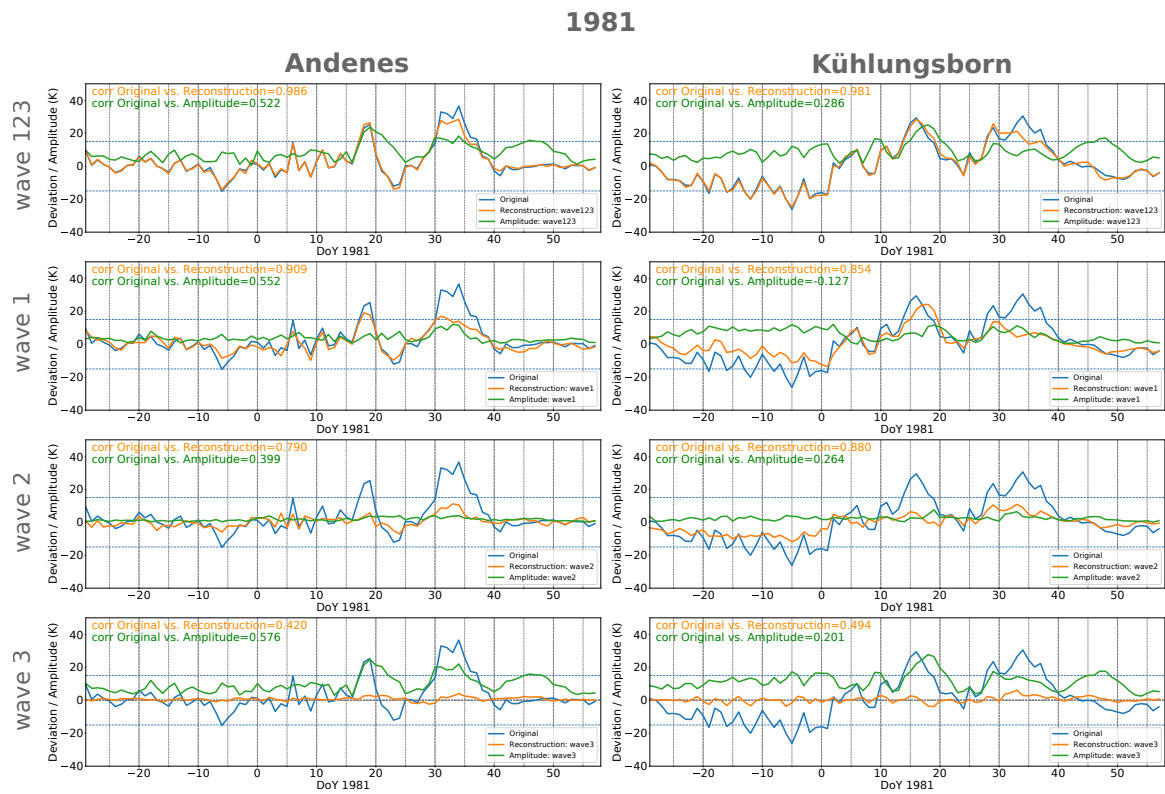

## 1982

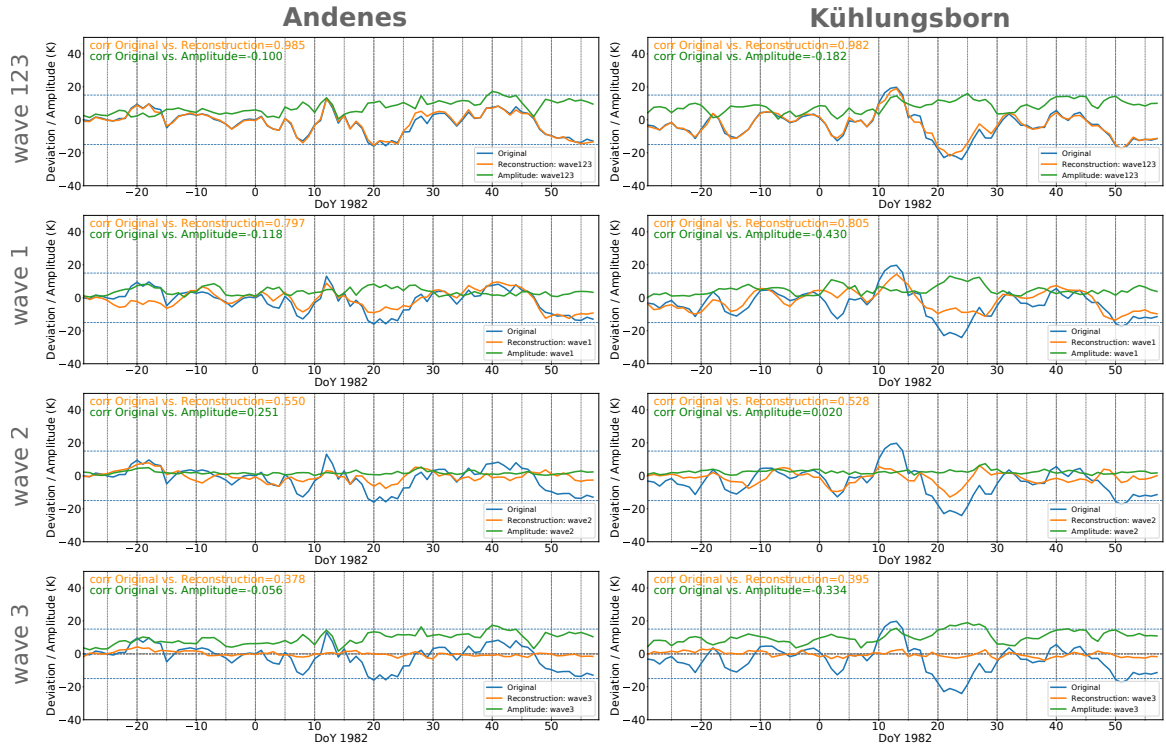

## 1983

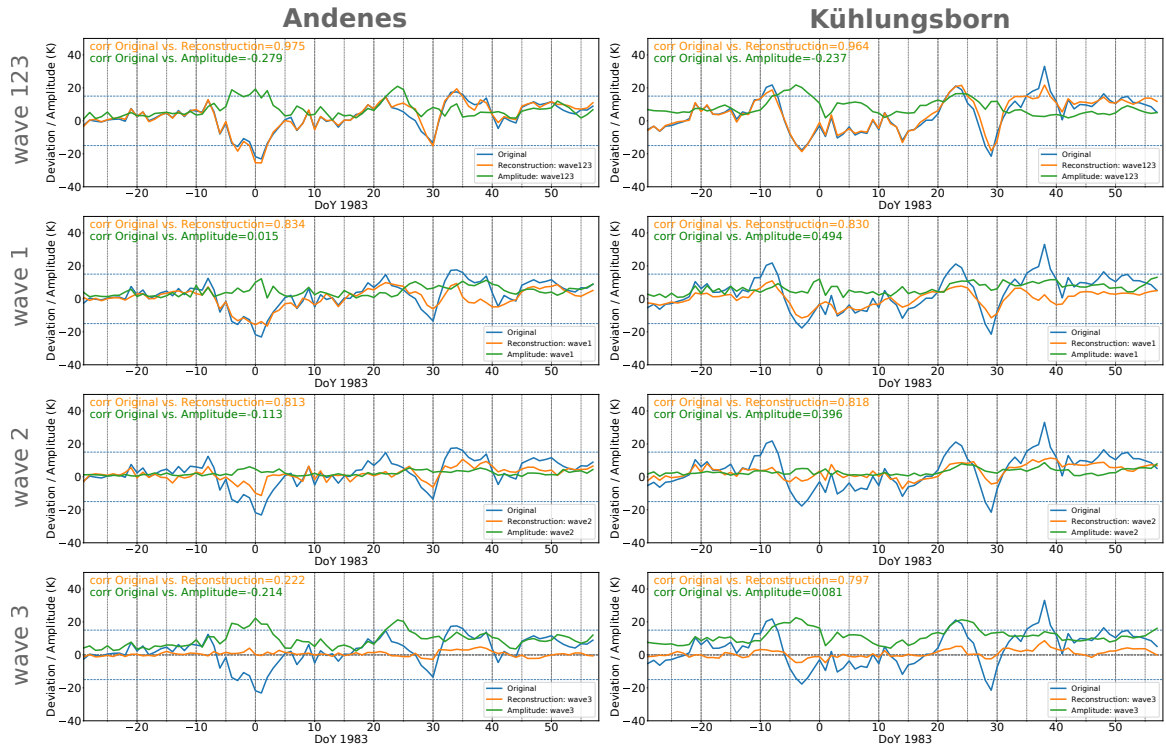

## 1984

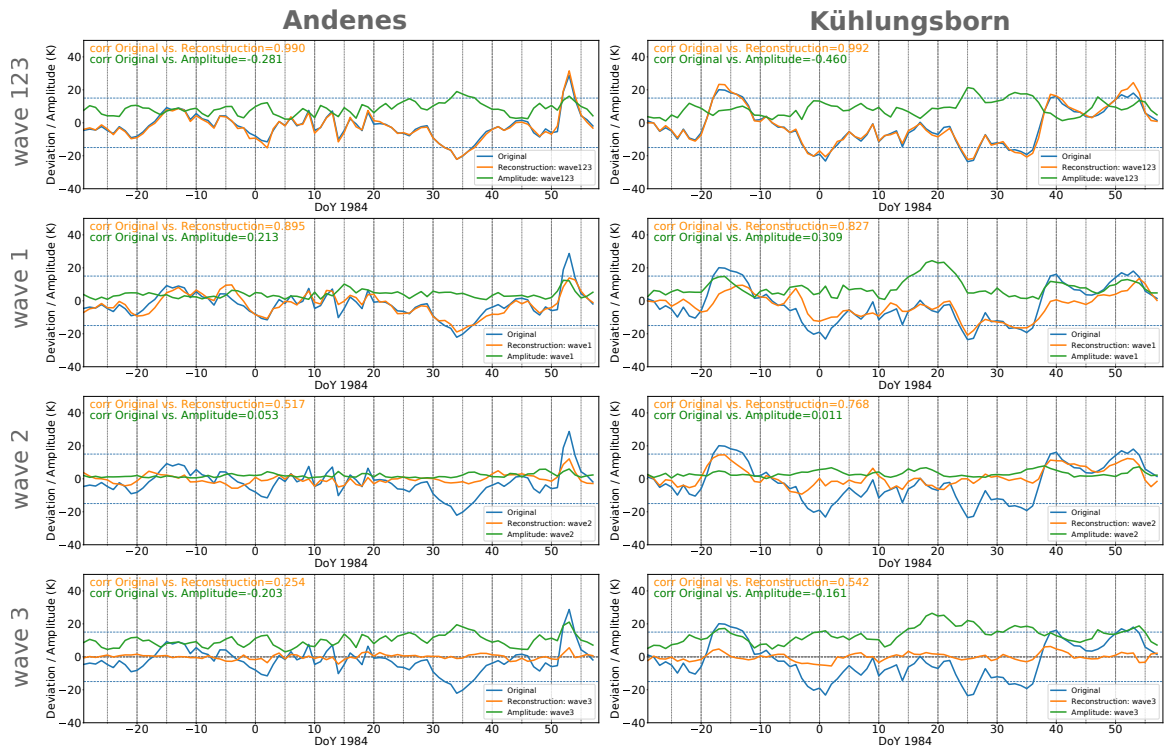

## 1985

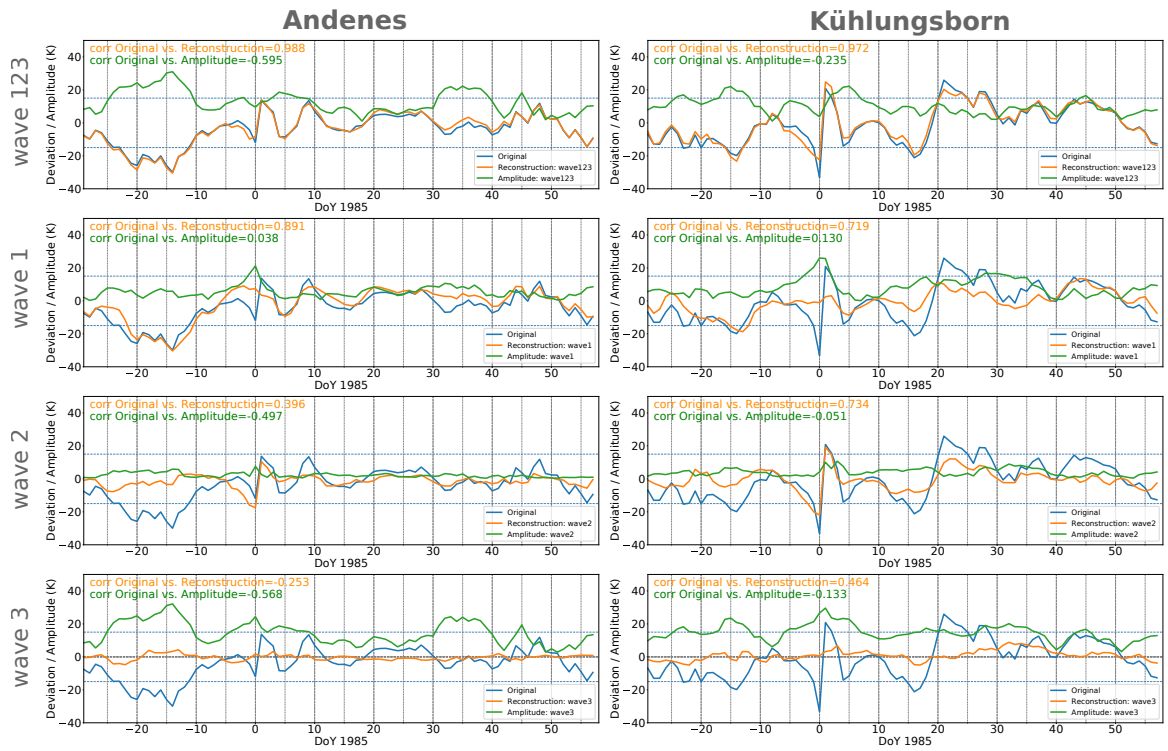

1986

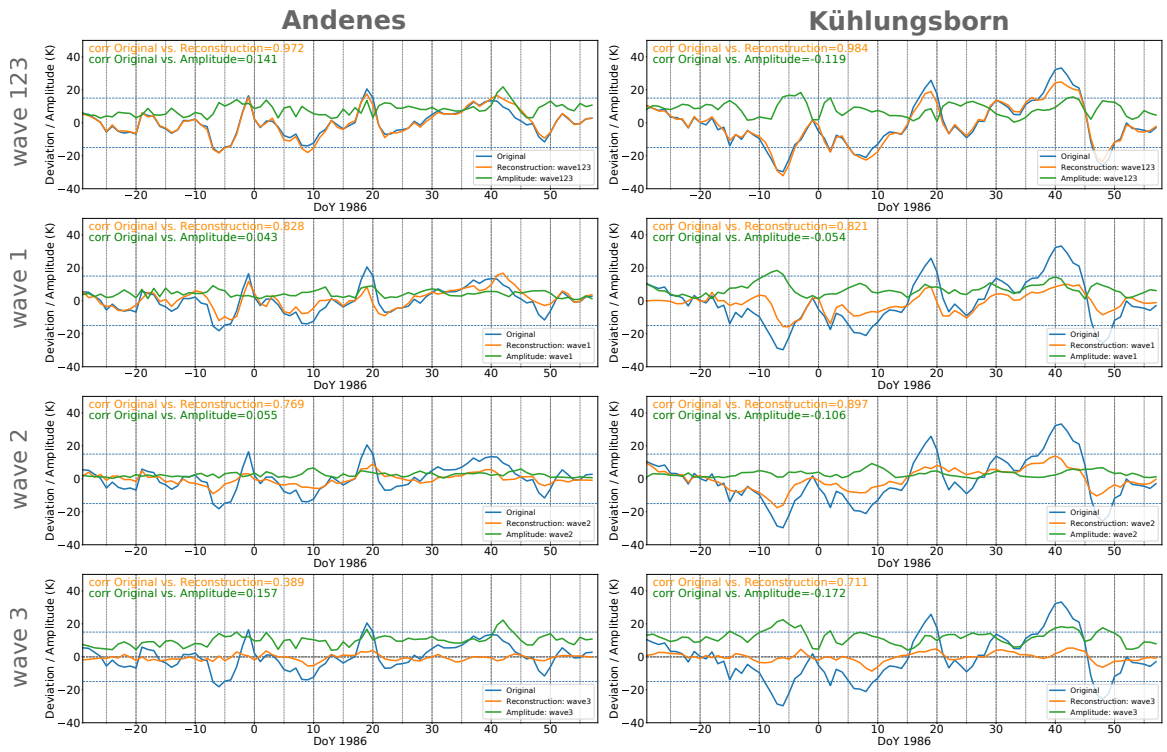

1987

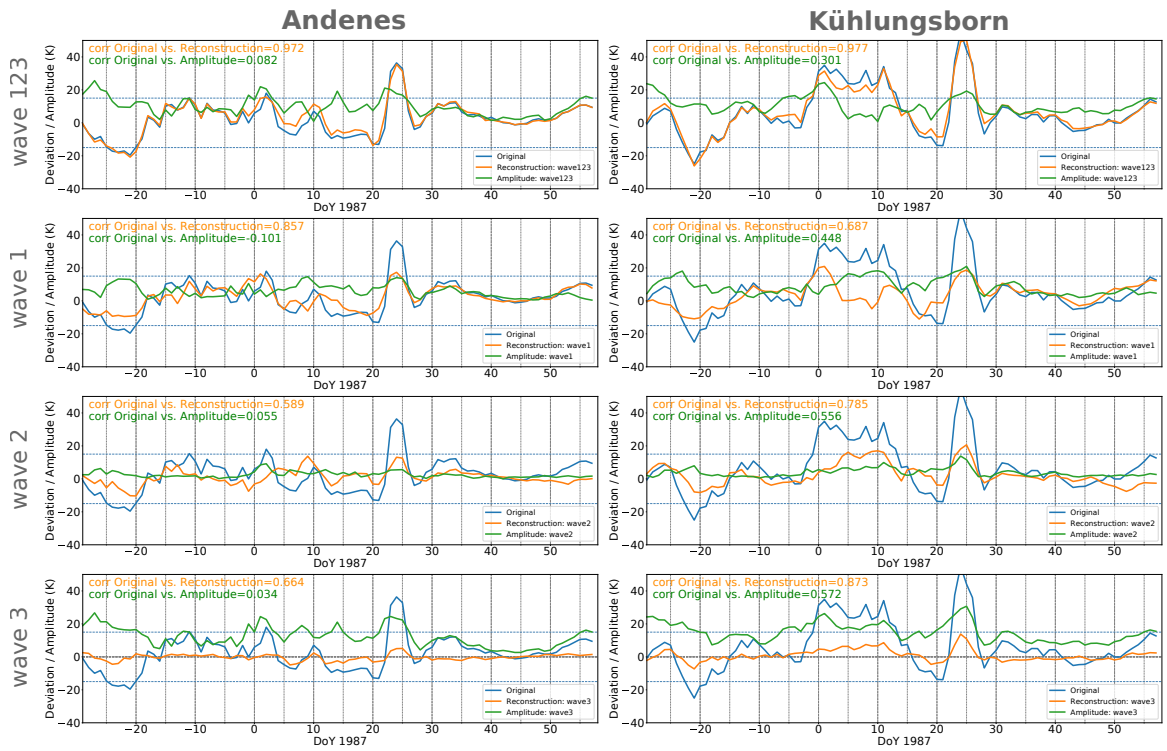

1988

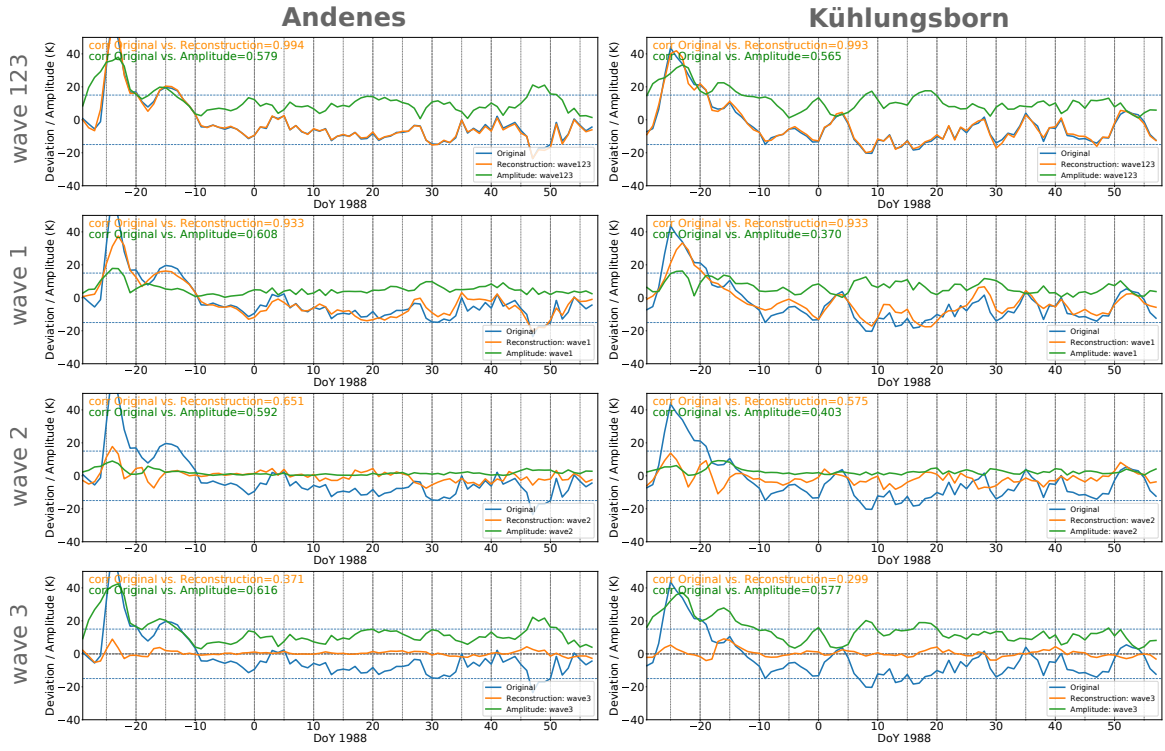

1989

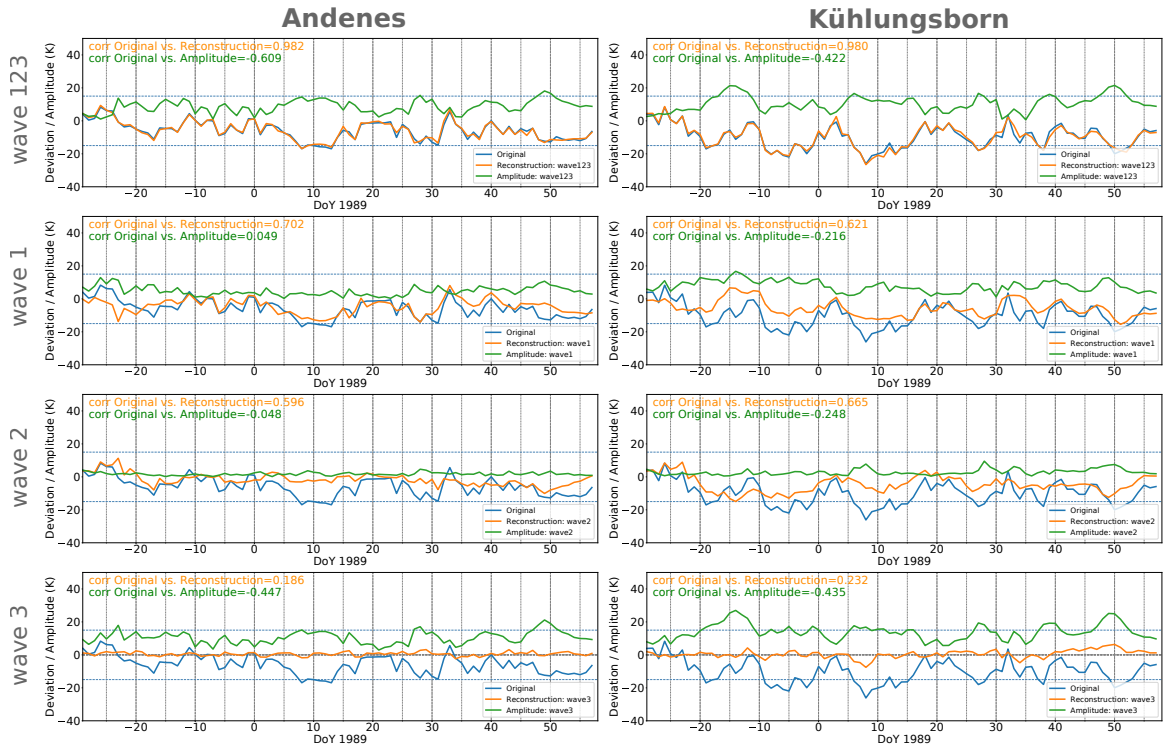



# 1990

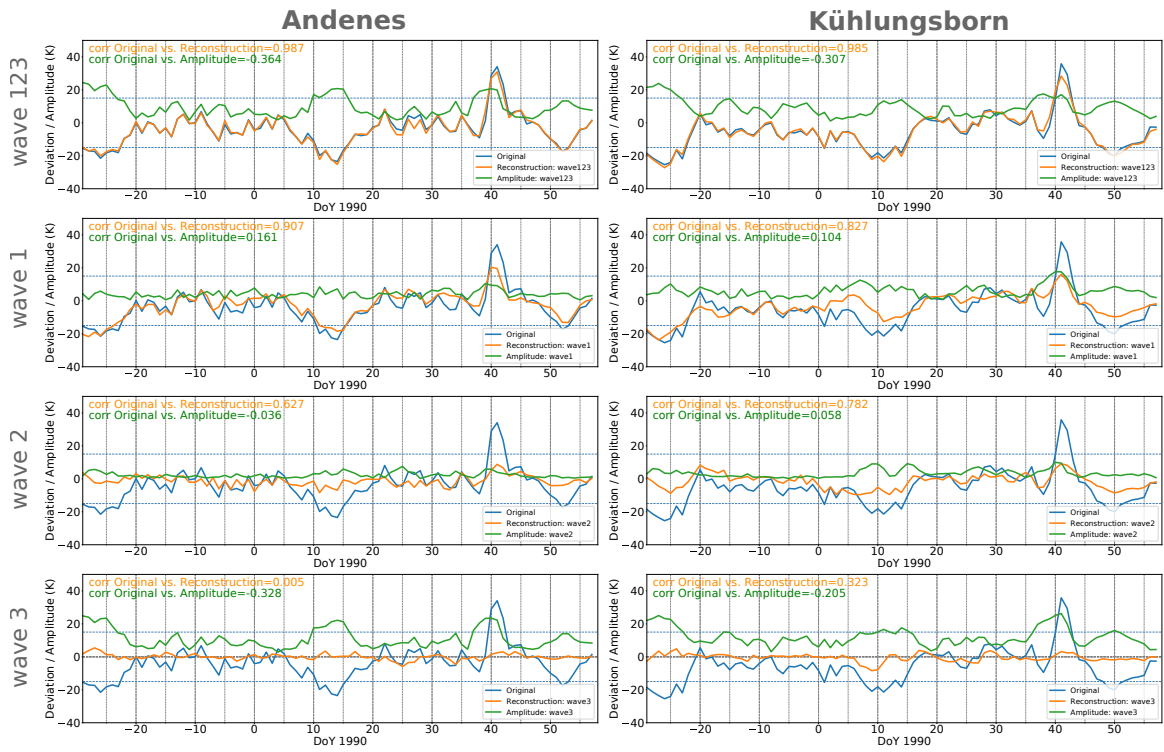

# 1991

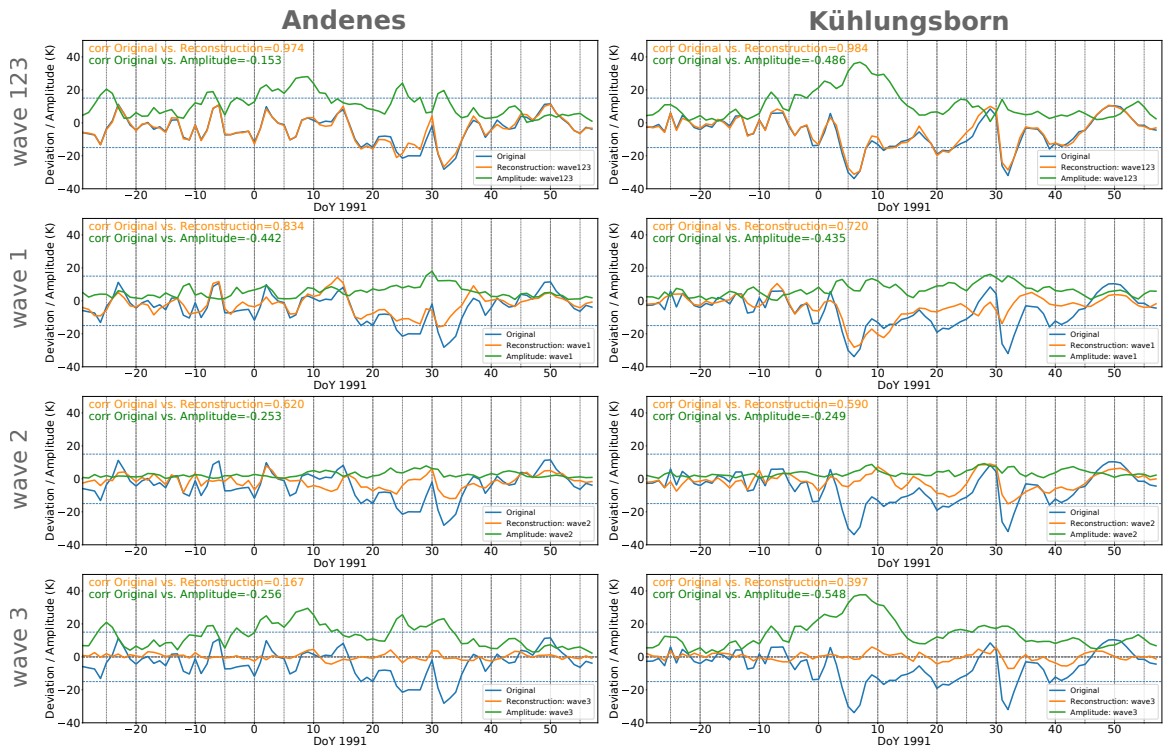

1992

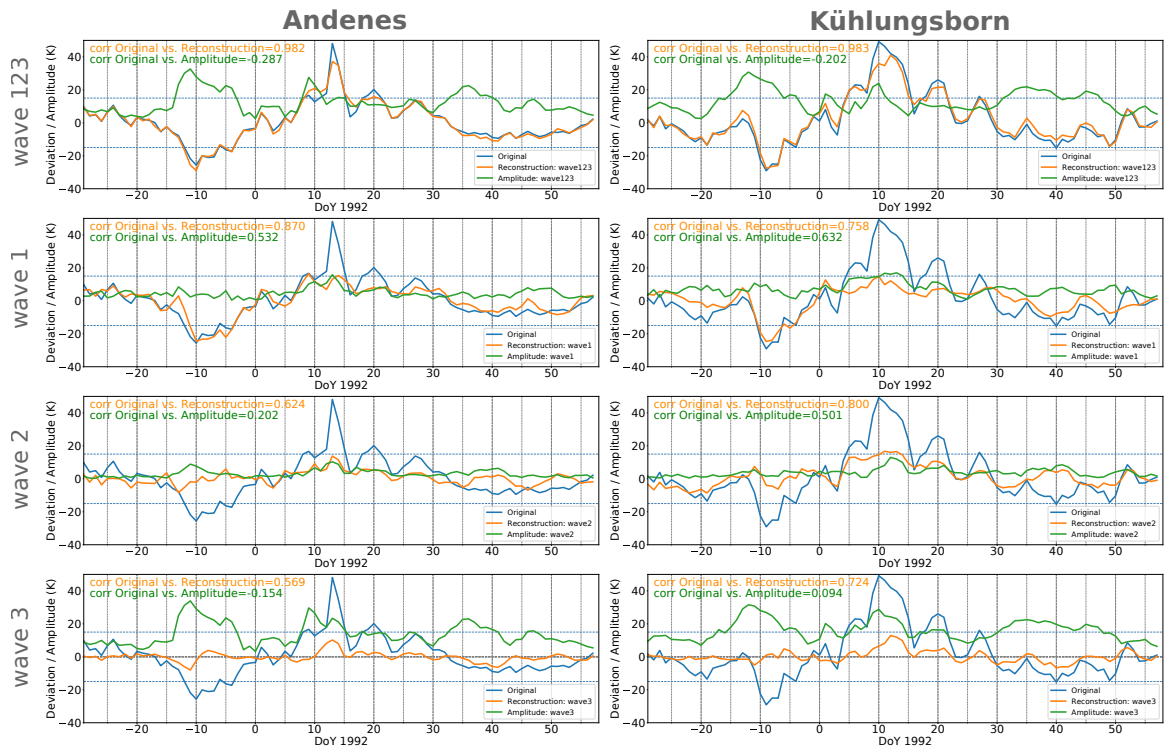

1993

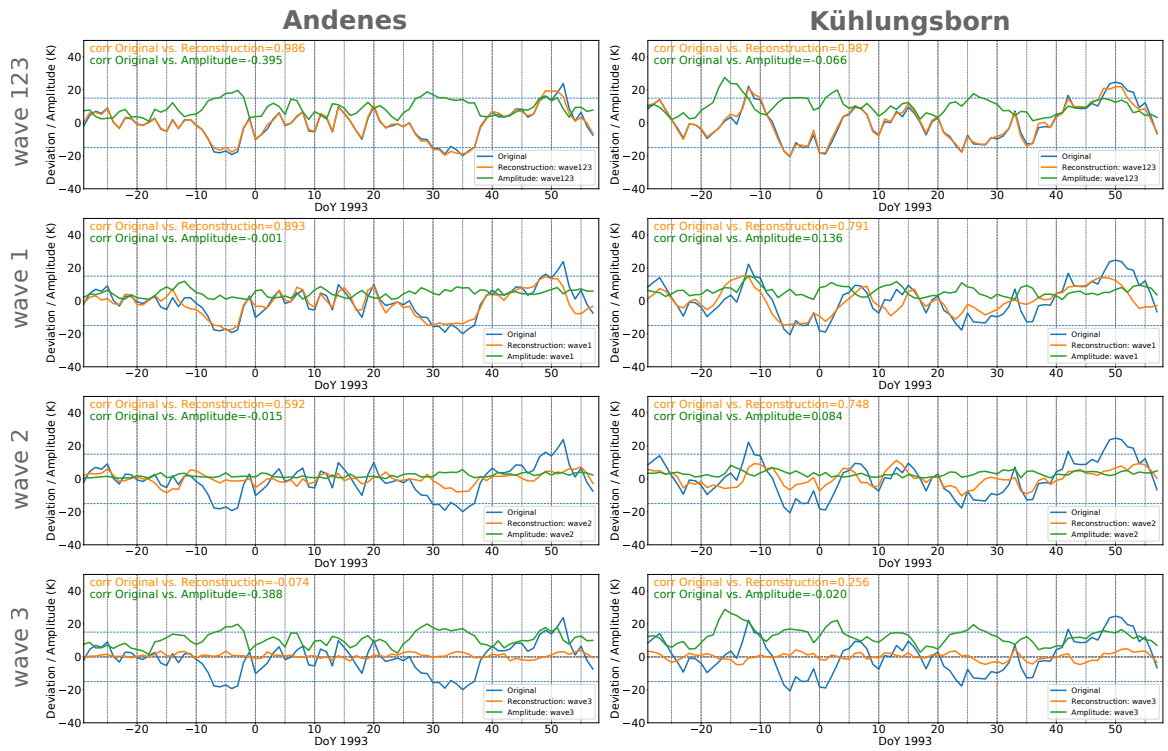

# 1994

## Andenes

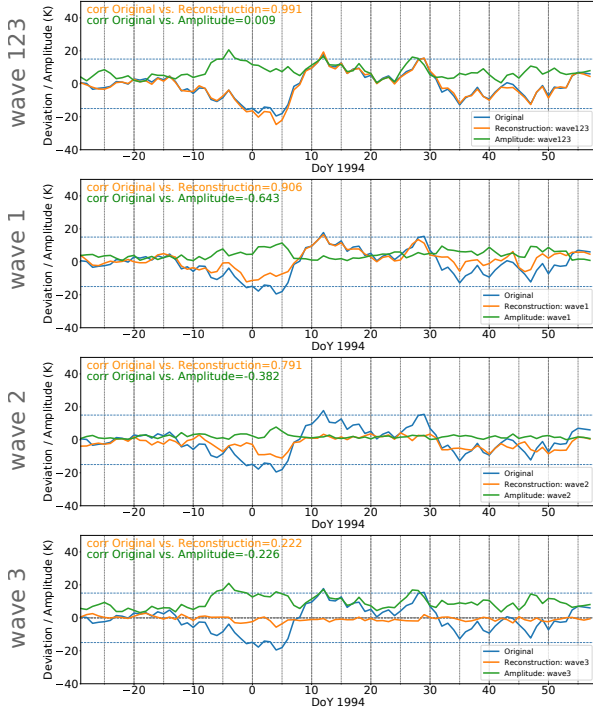

## Kühlungsborn

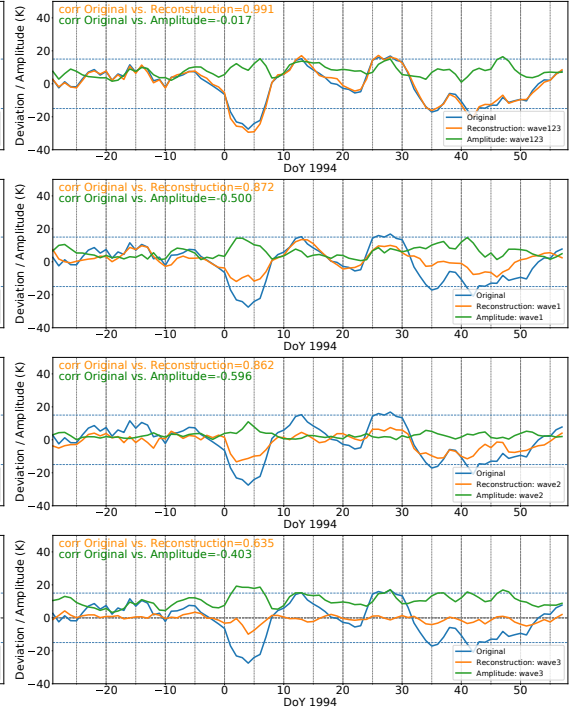

# 1995

## Andenes

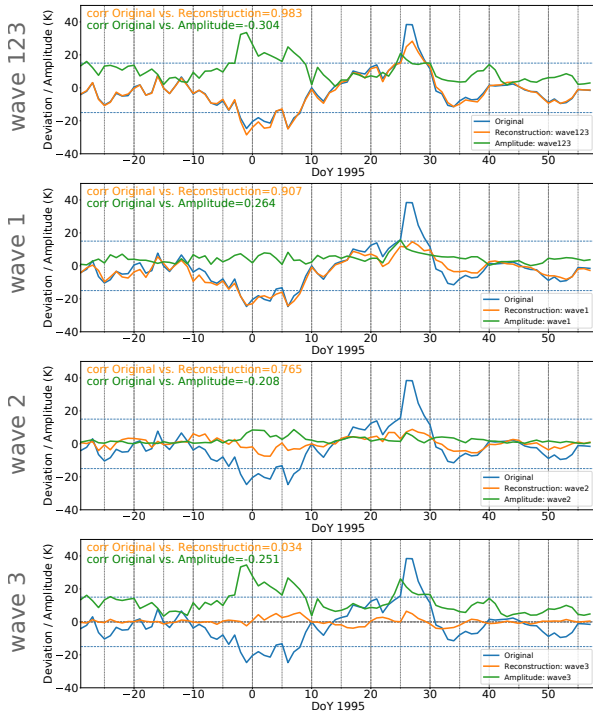

## Kühlungsborn

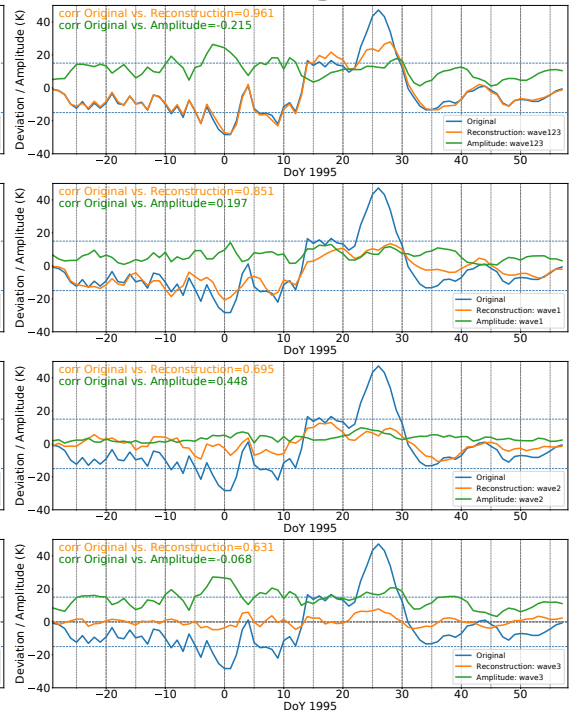



1996

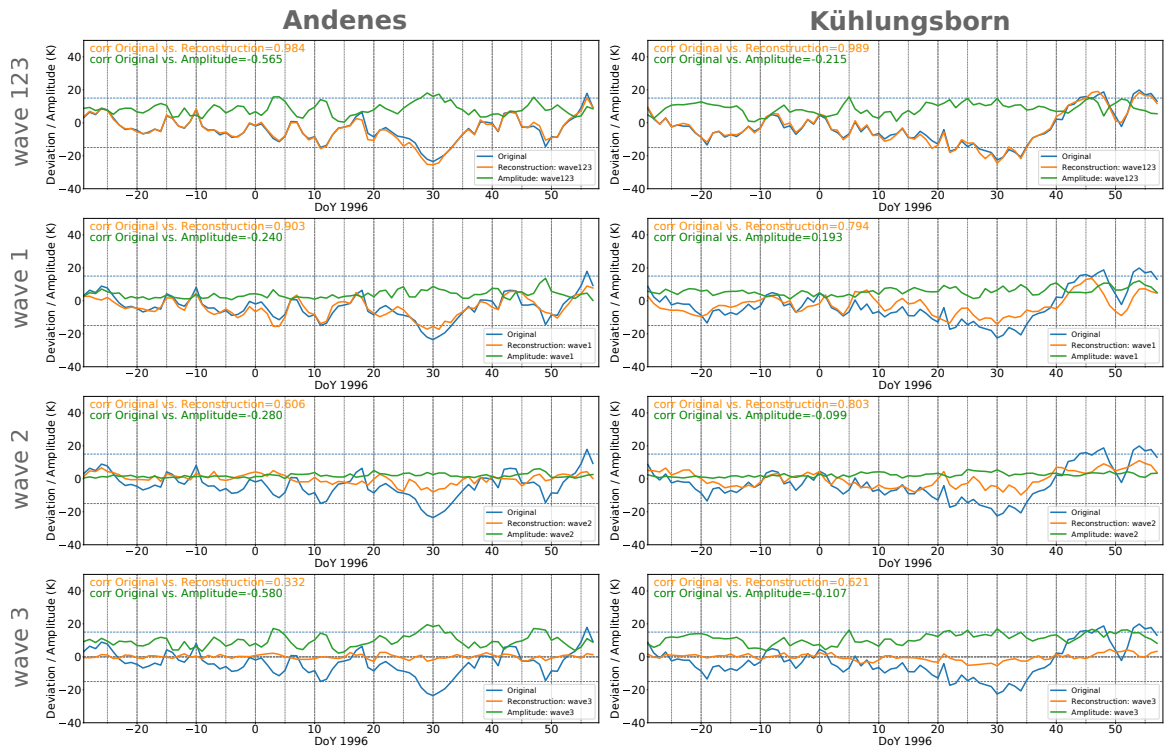

1997

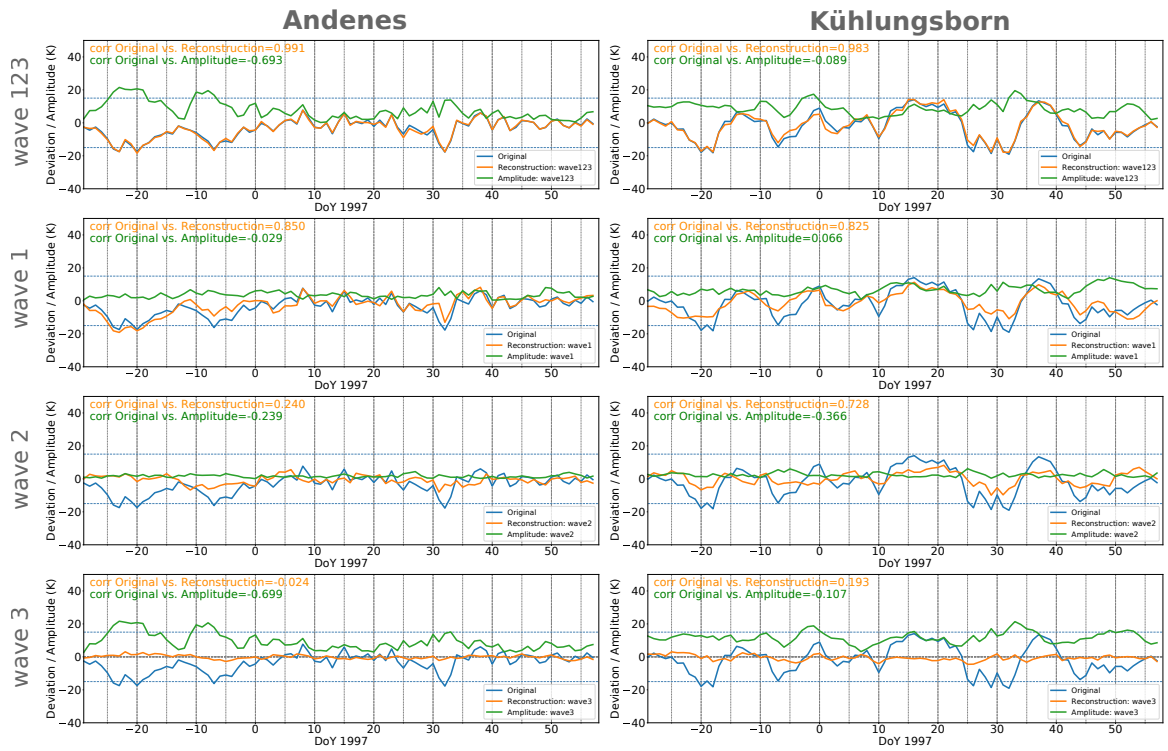

## 1998

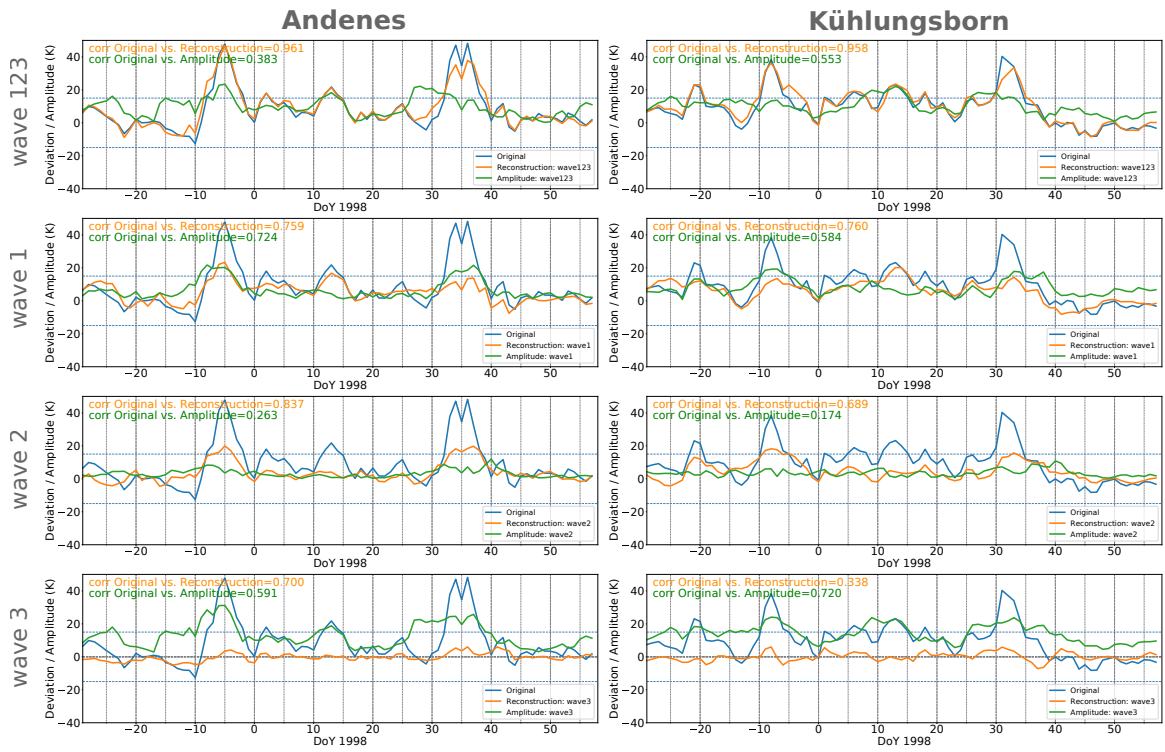

## 1999

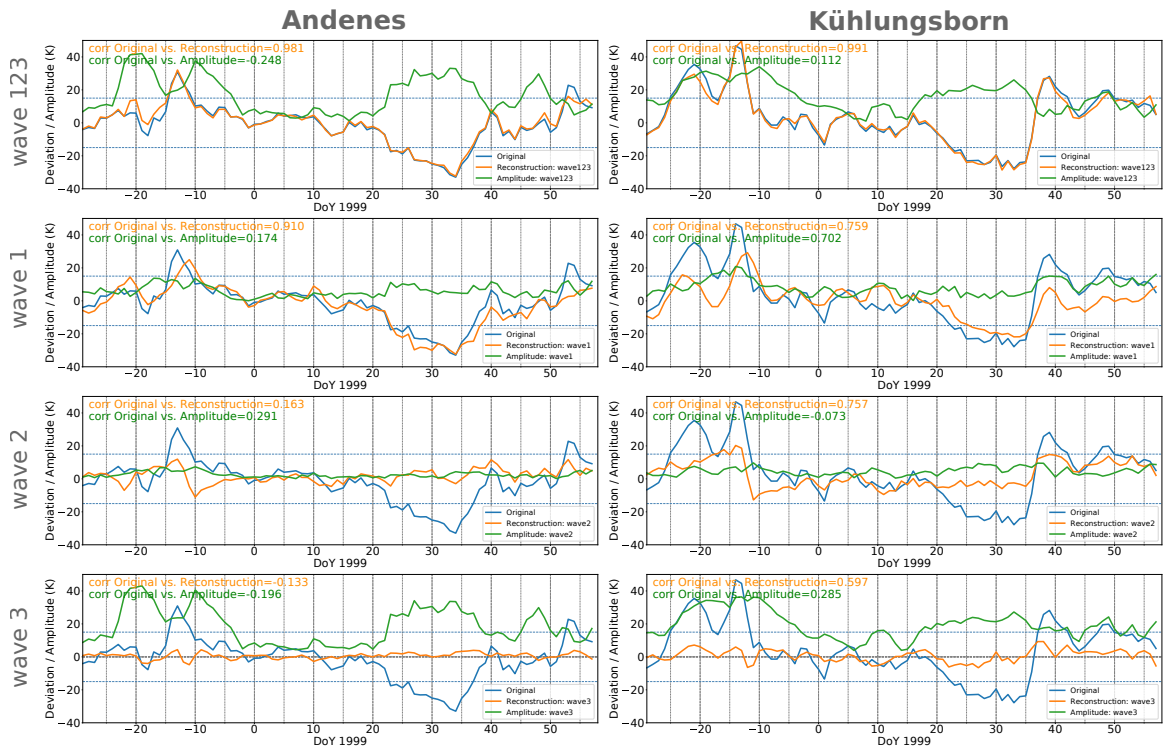

## 2000

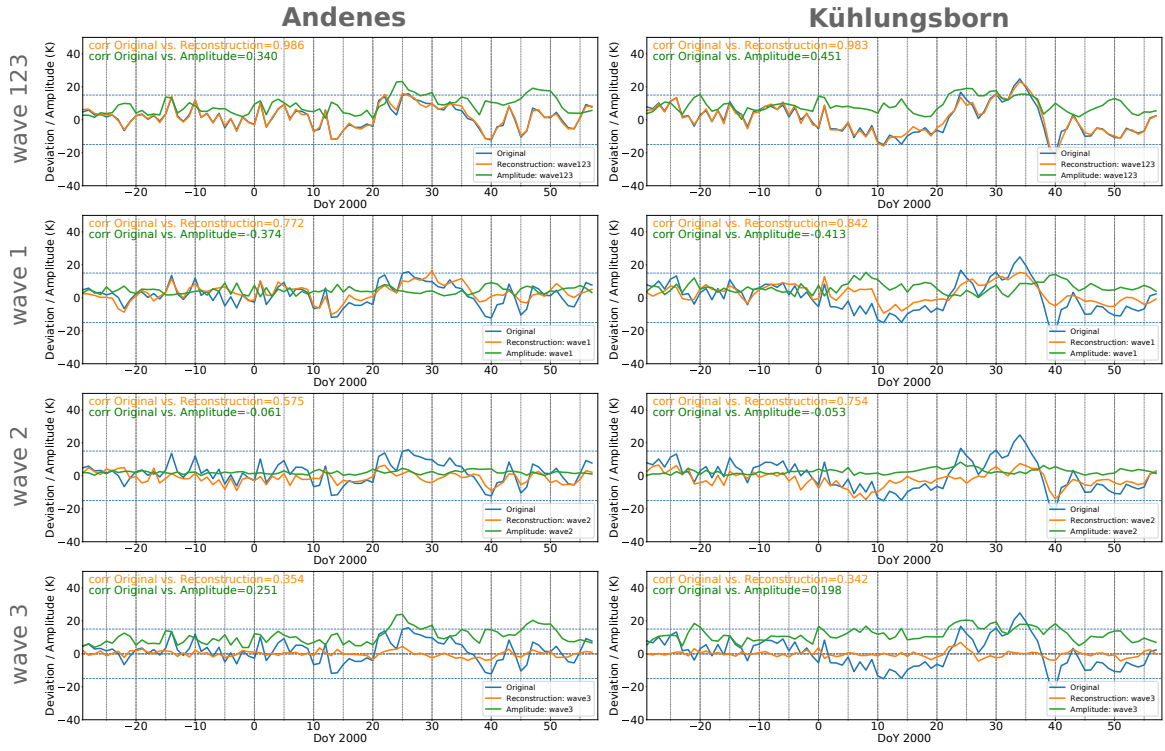

## 2001

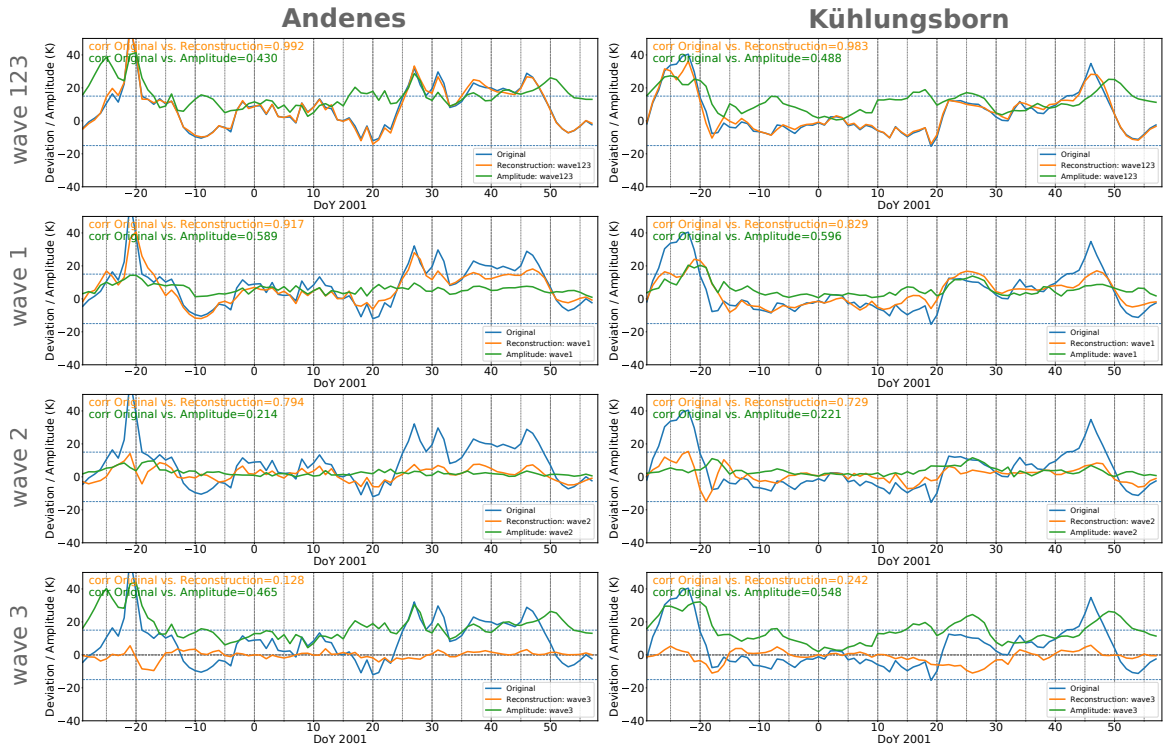

## 2002

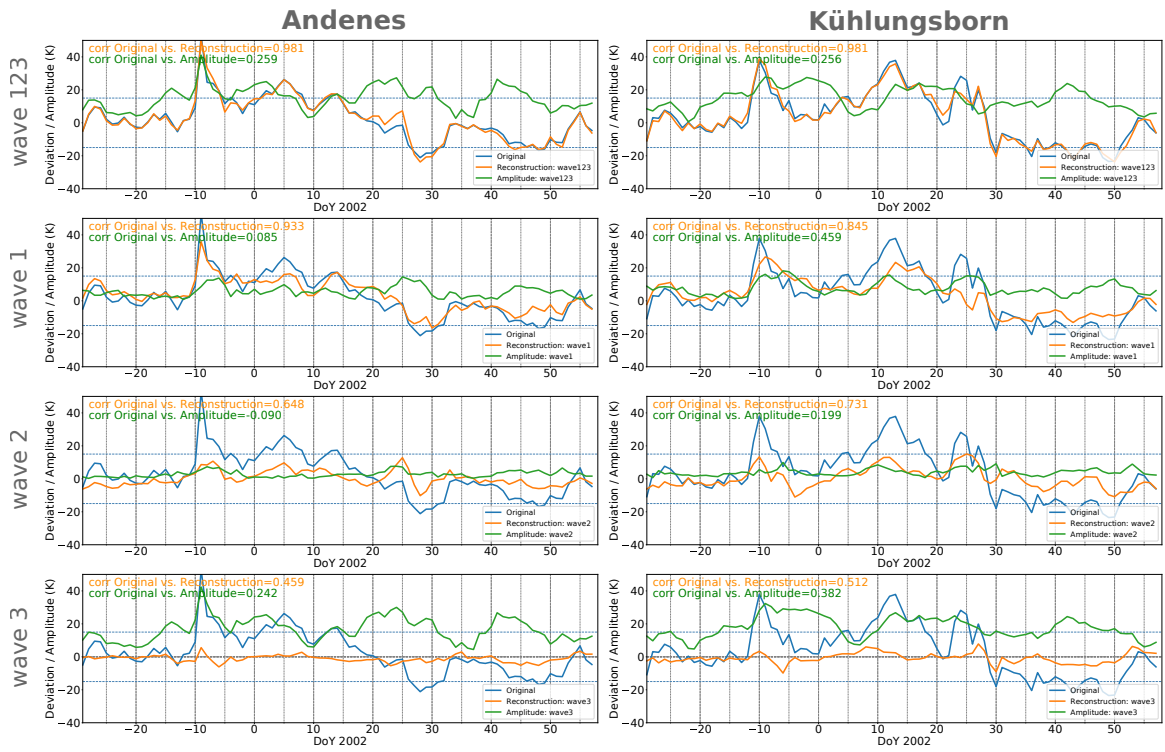

## 2003

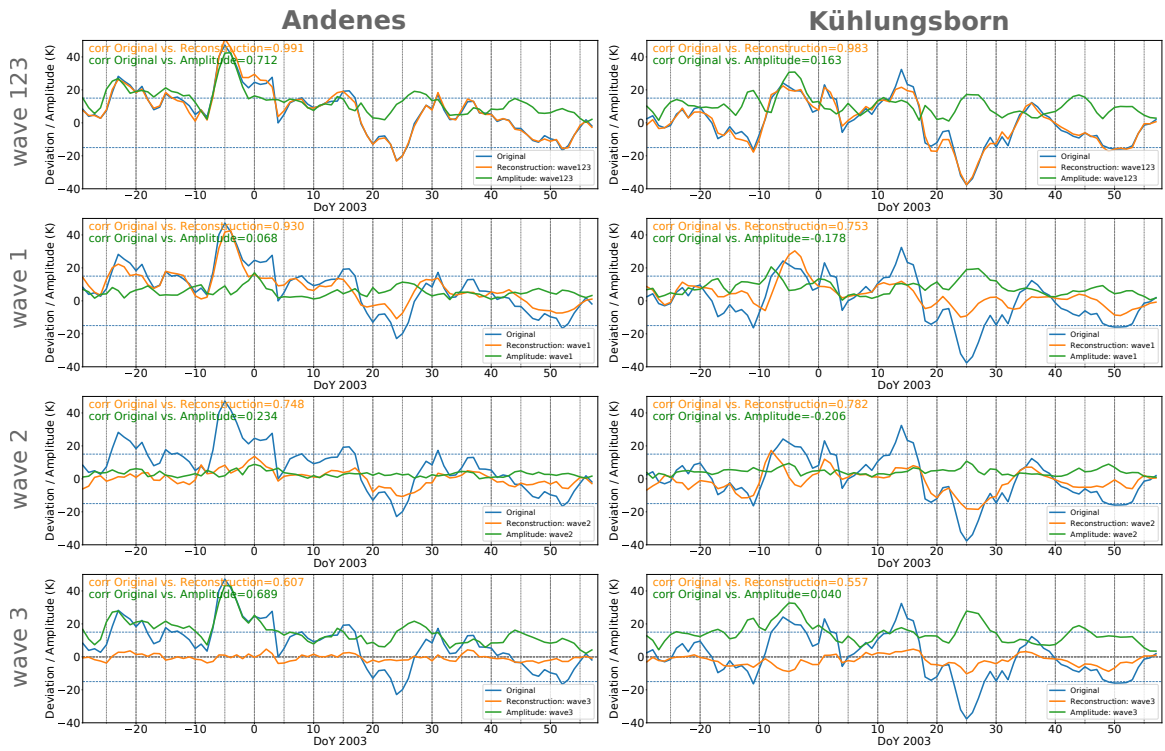



## 2004

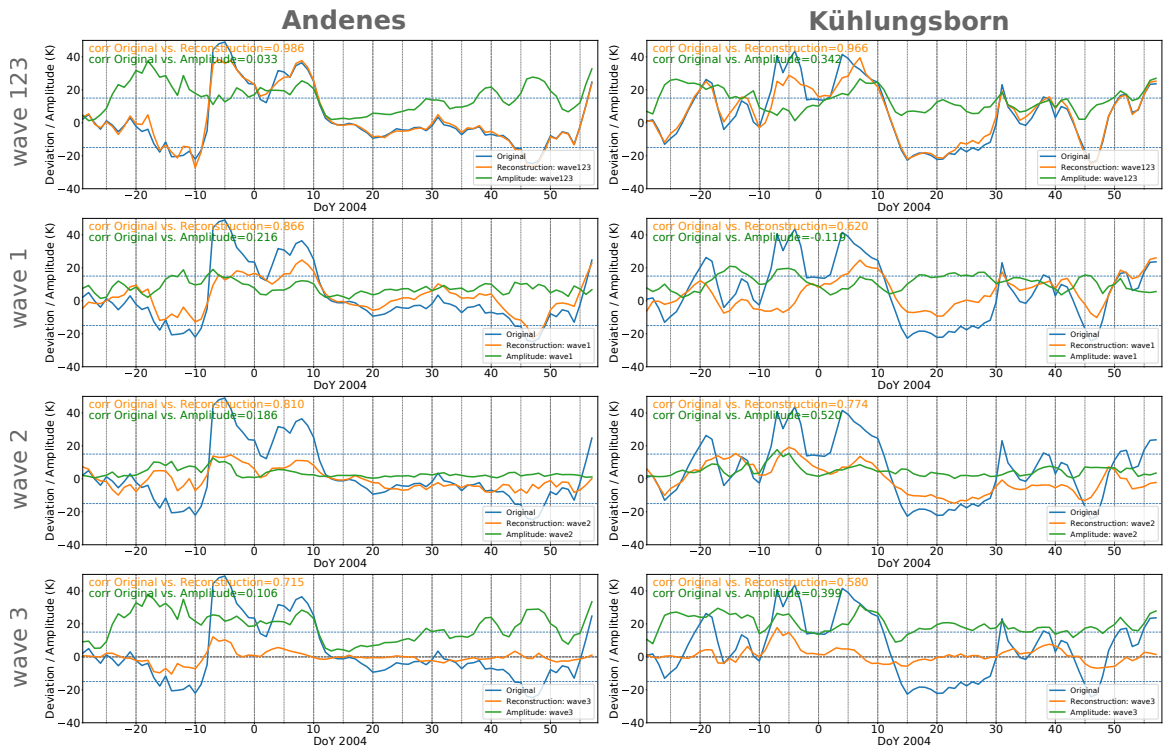

## 2005

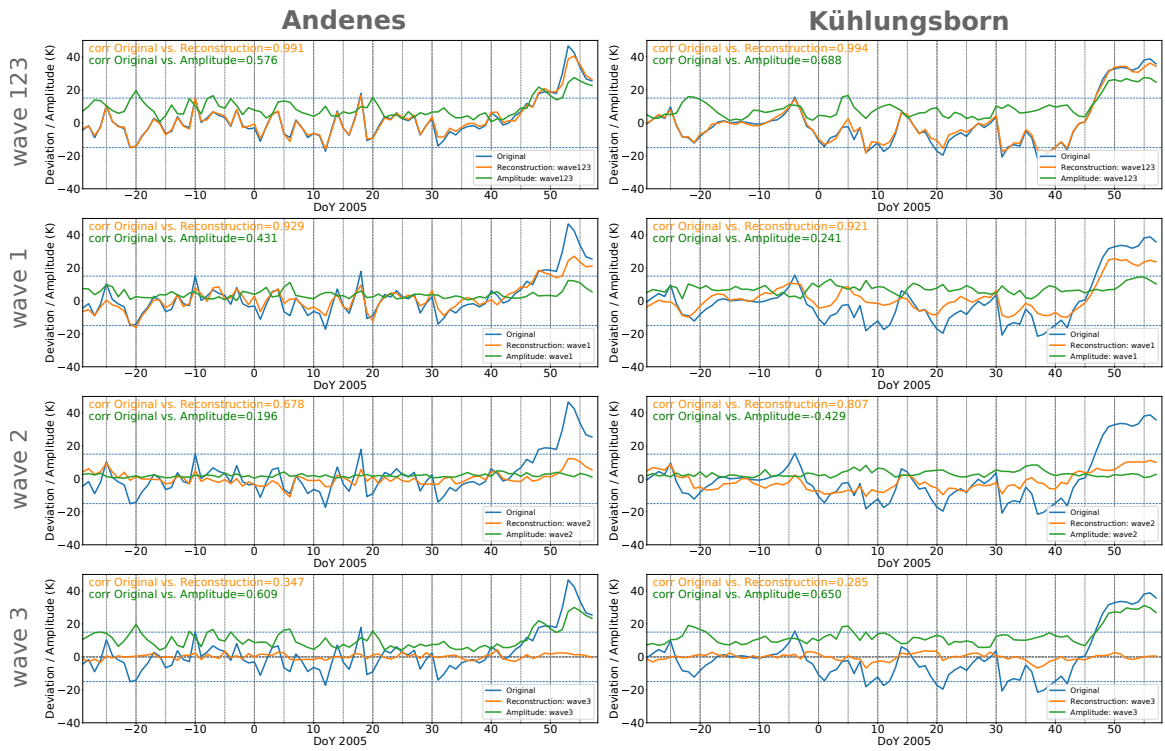



2006

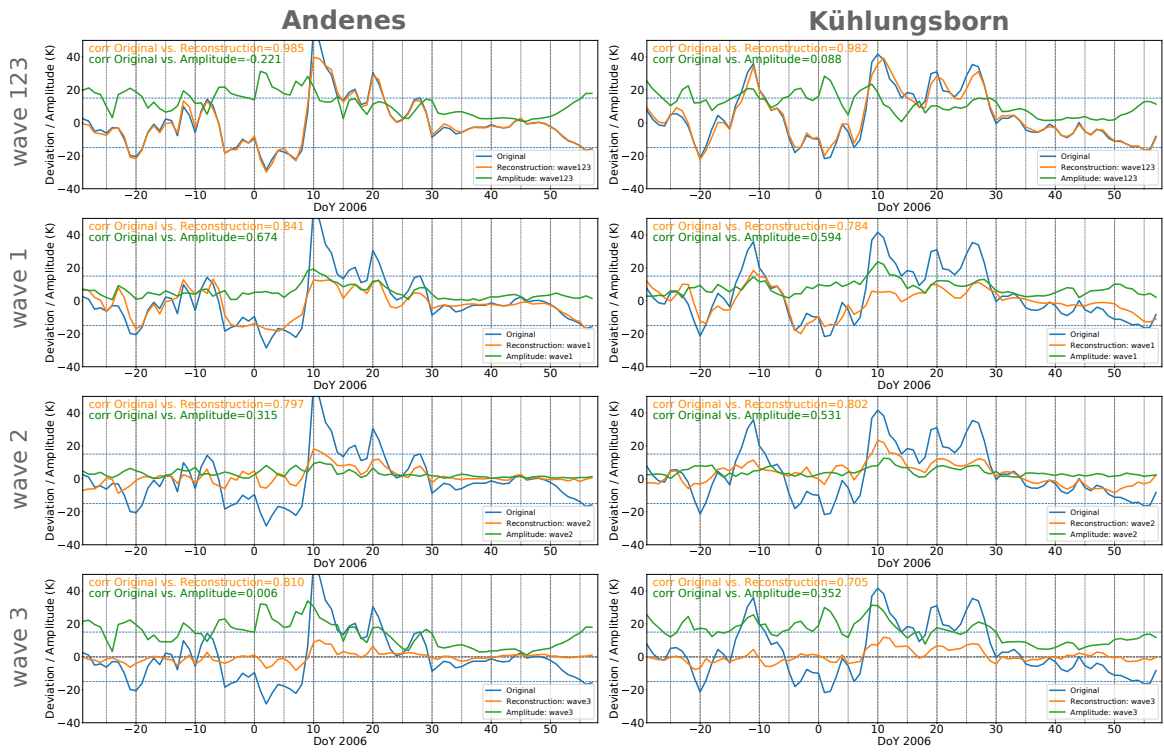

2007

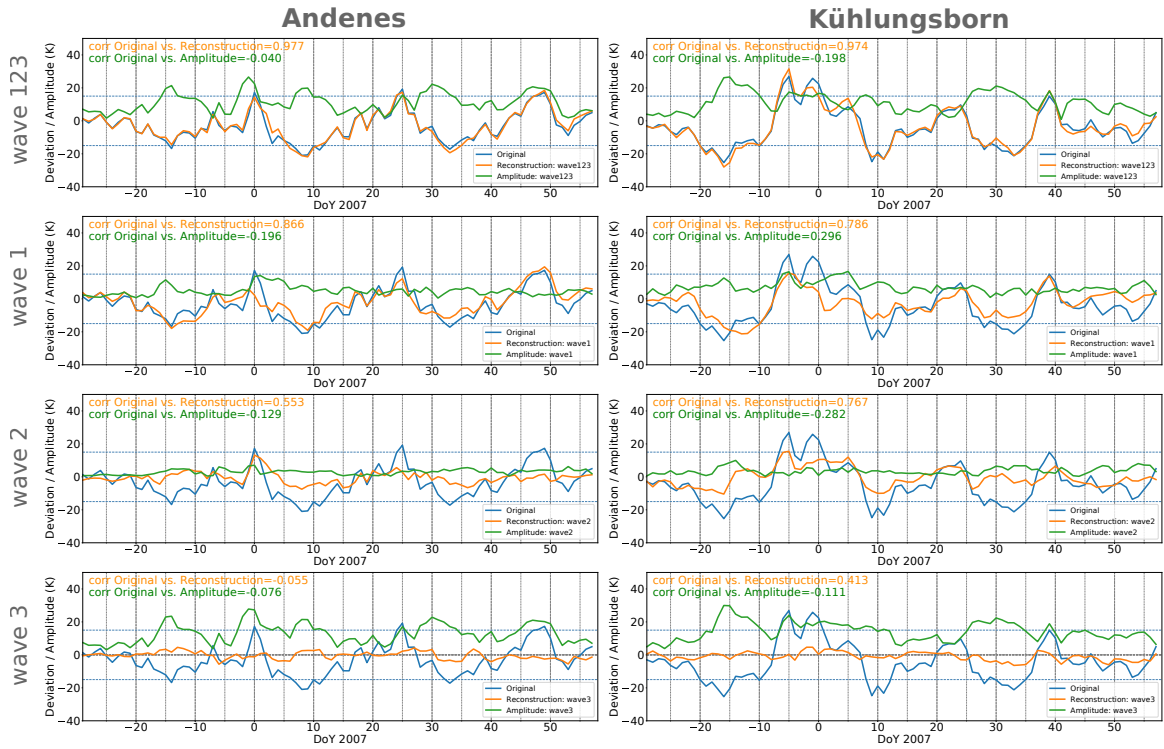

2008

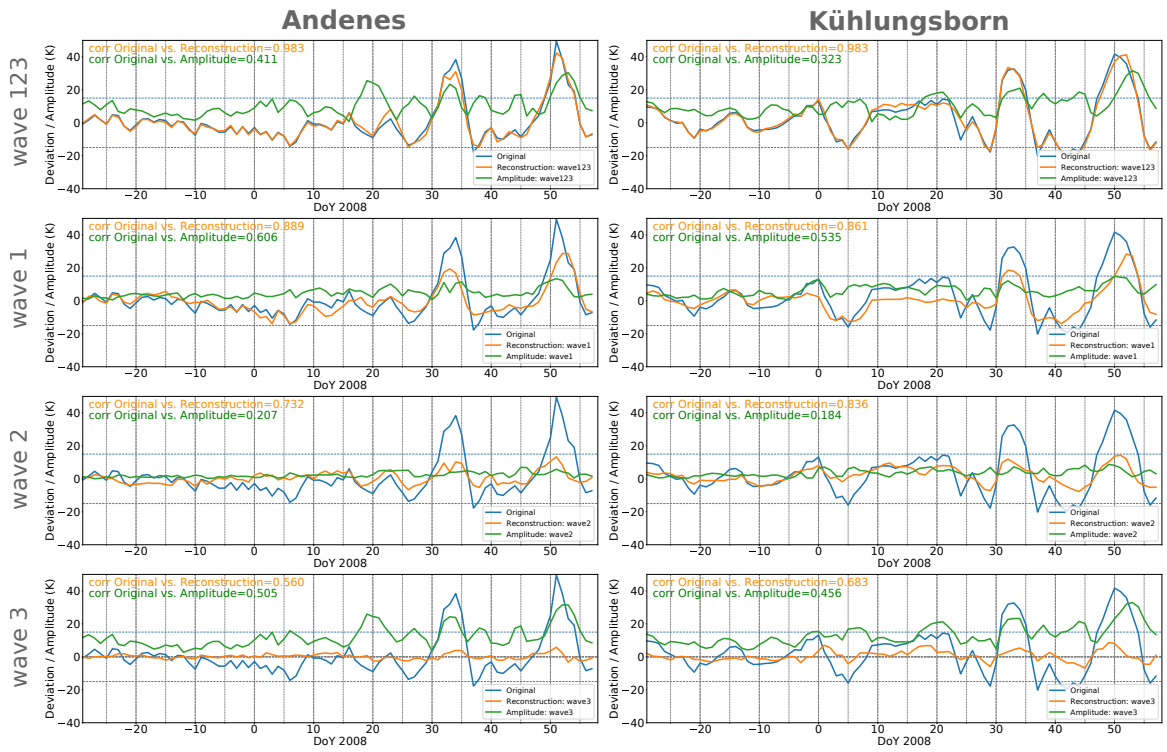

2009

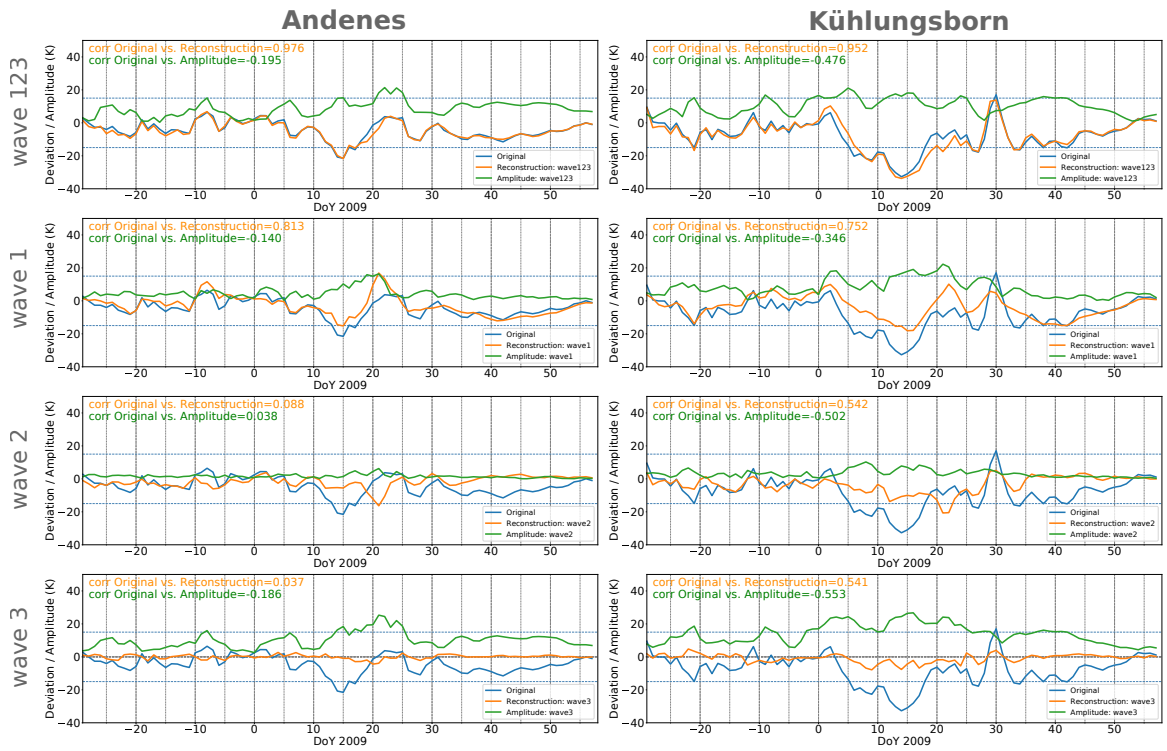

2010

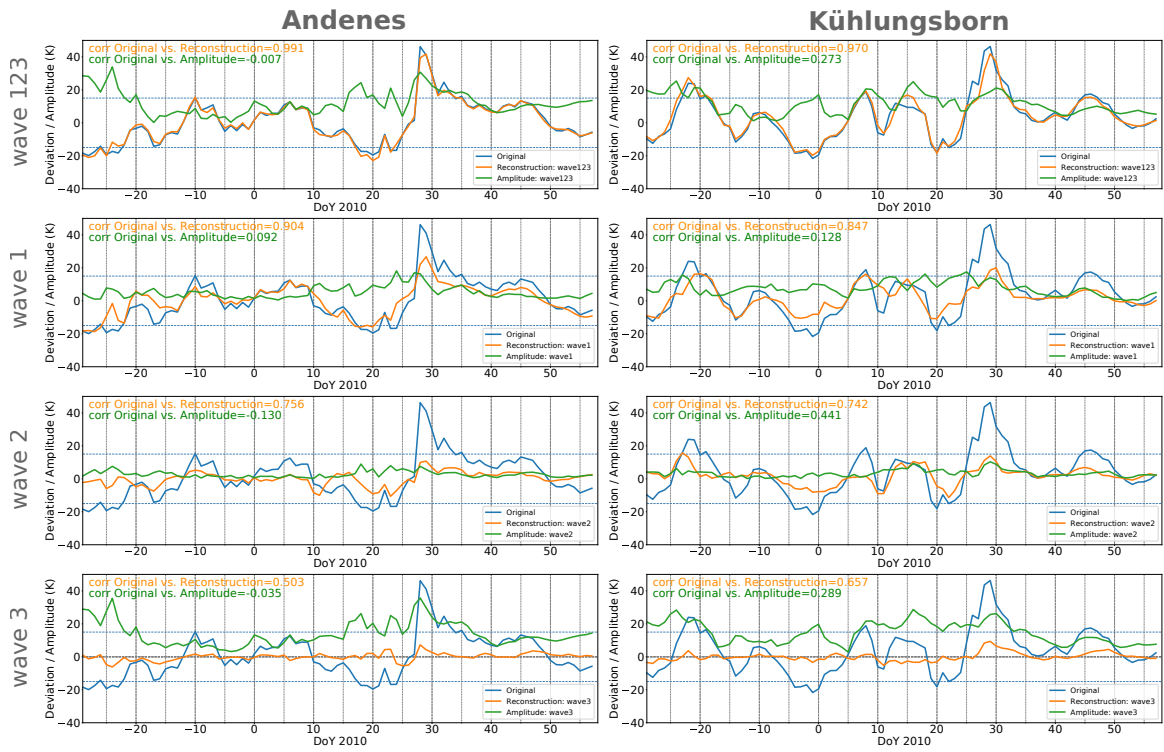

2011

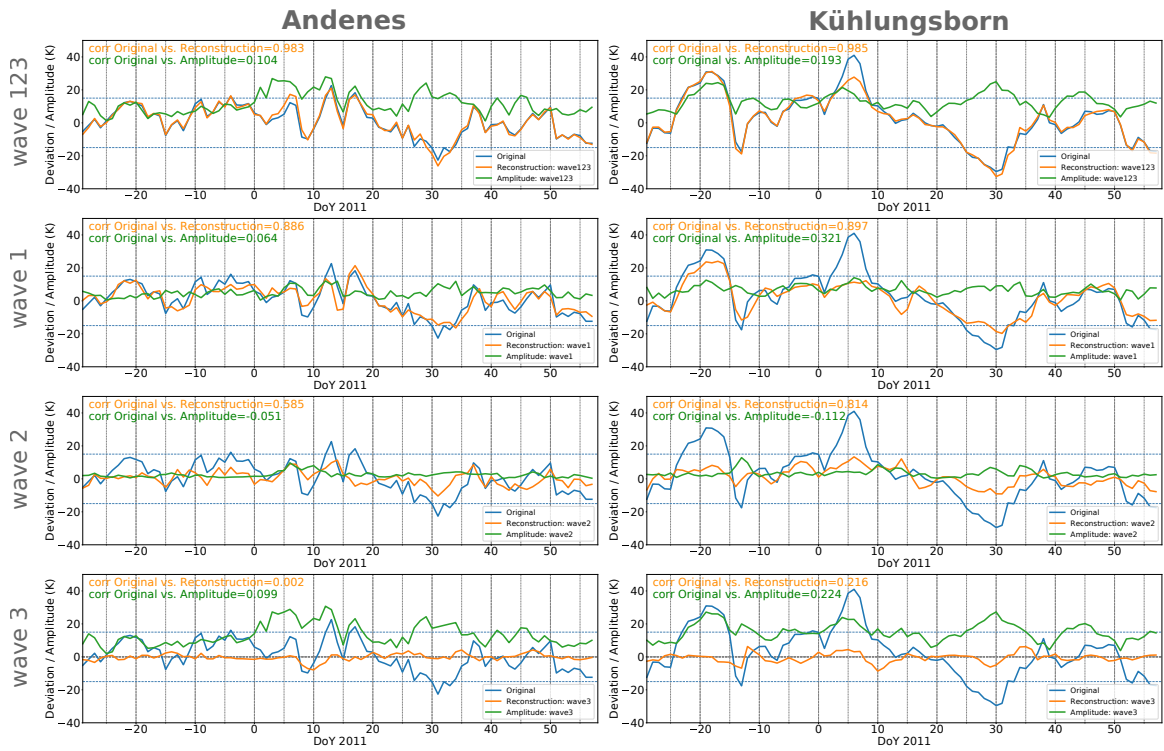

## 2012

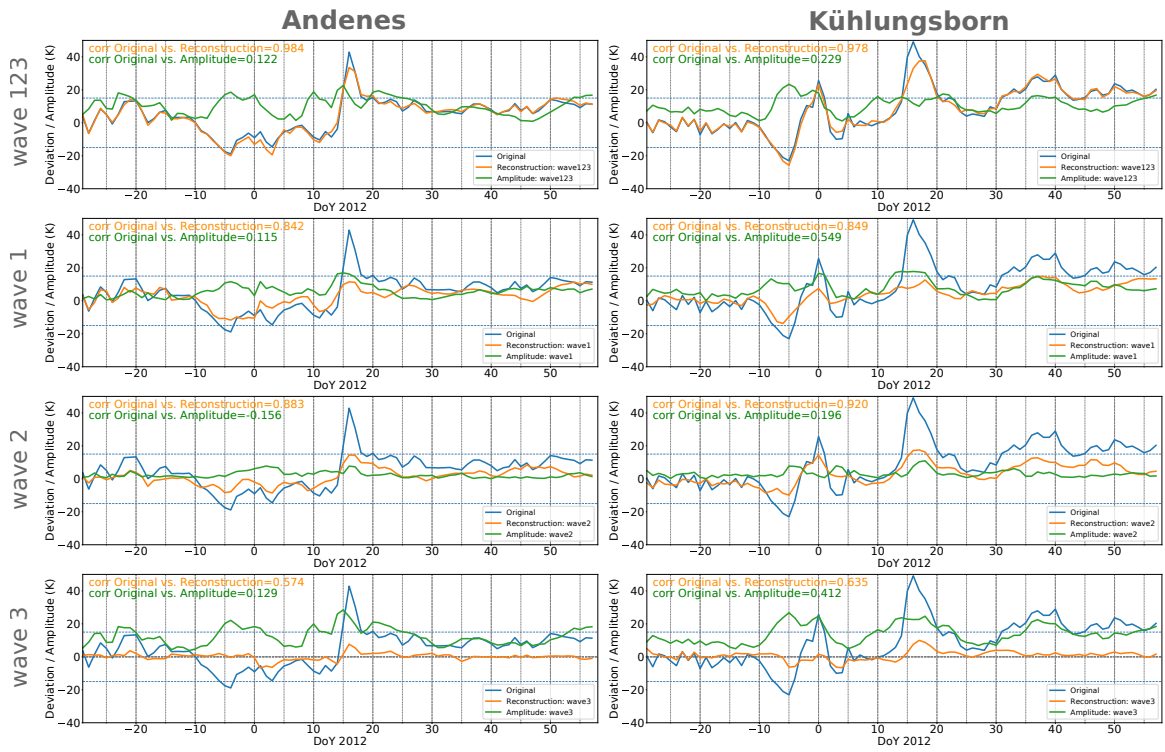

## 2013

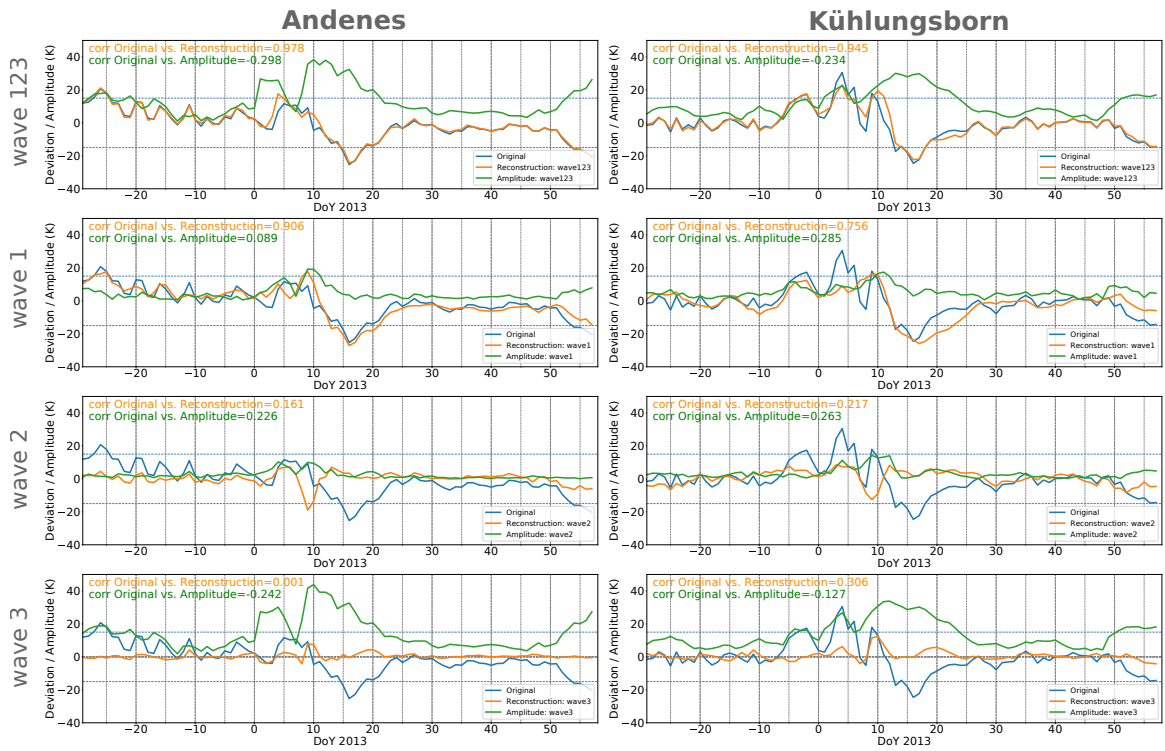



## 2014

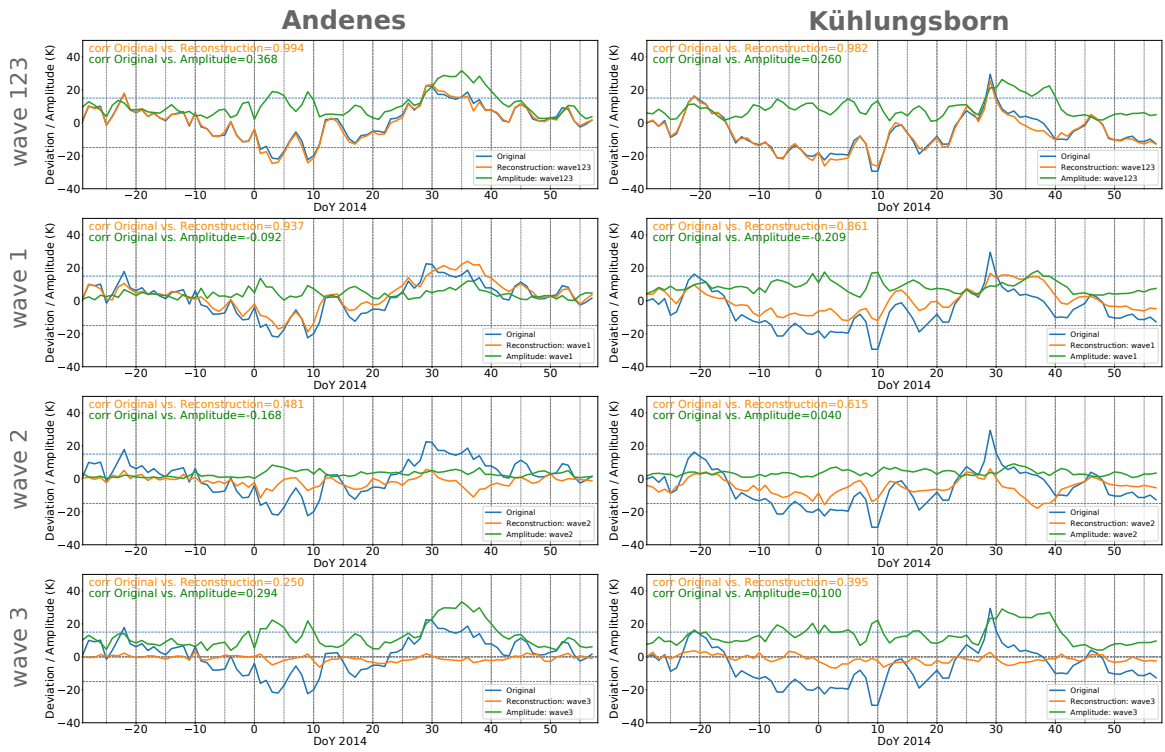

## 2015

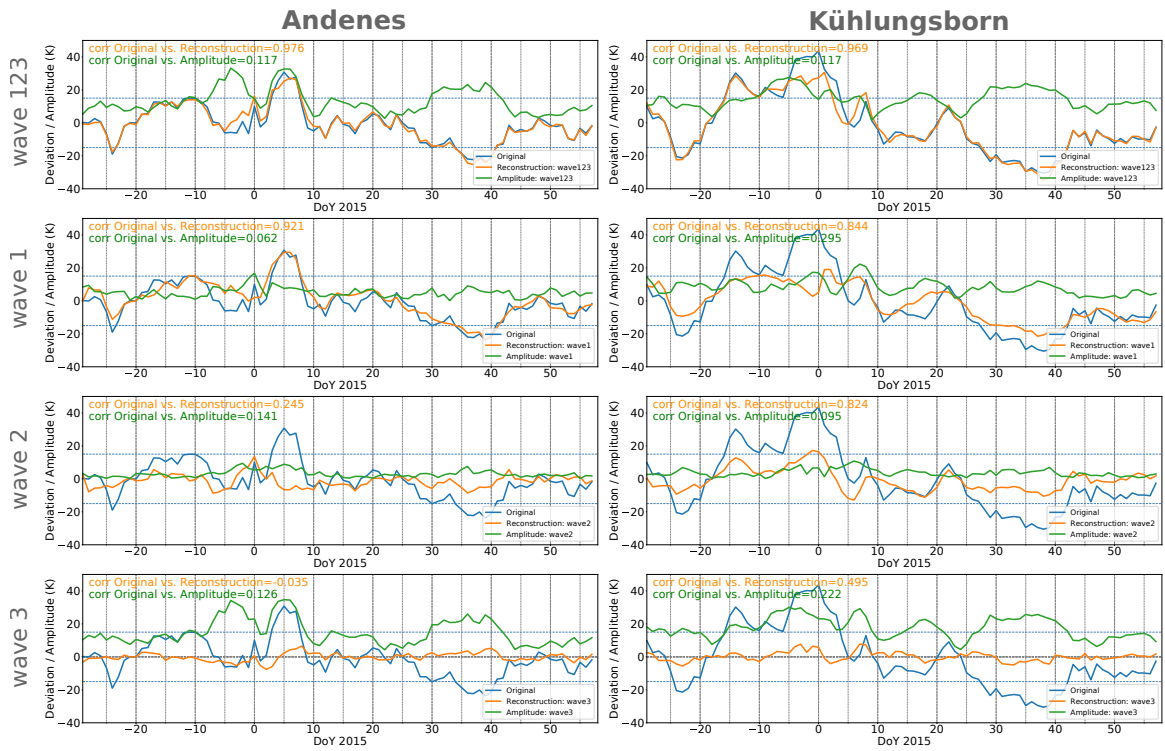



2016

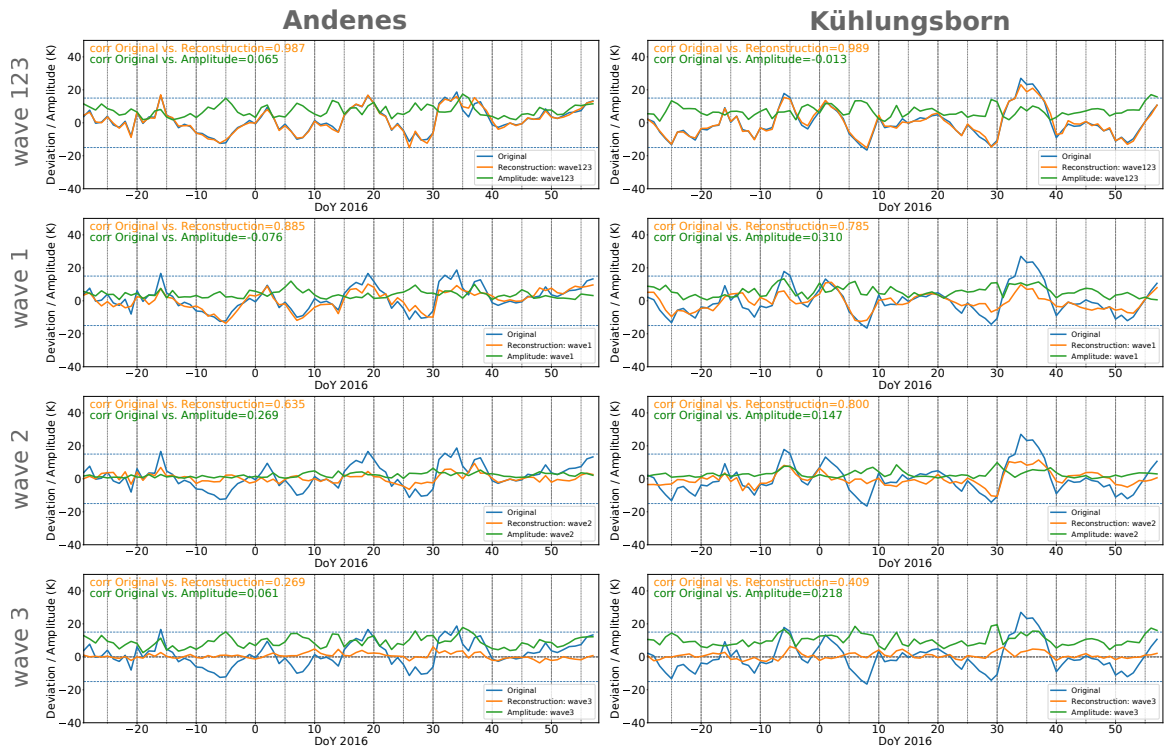

2017

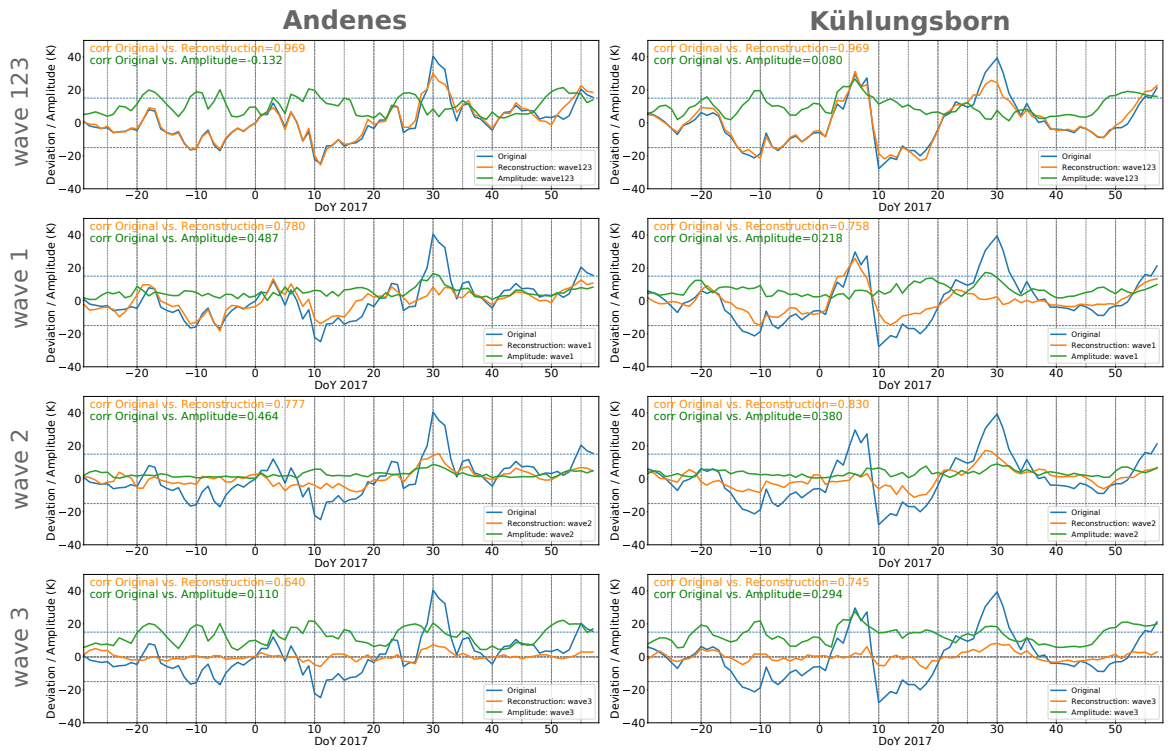

2018

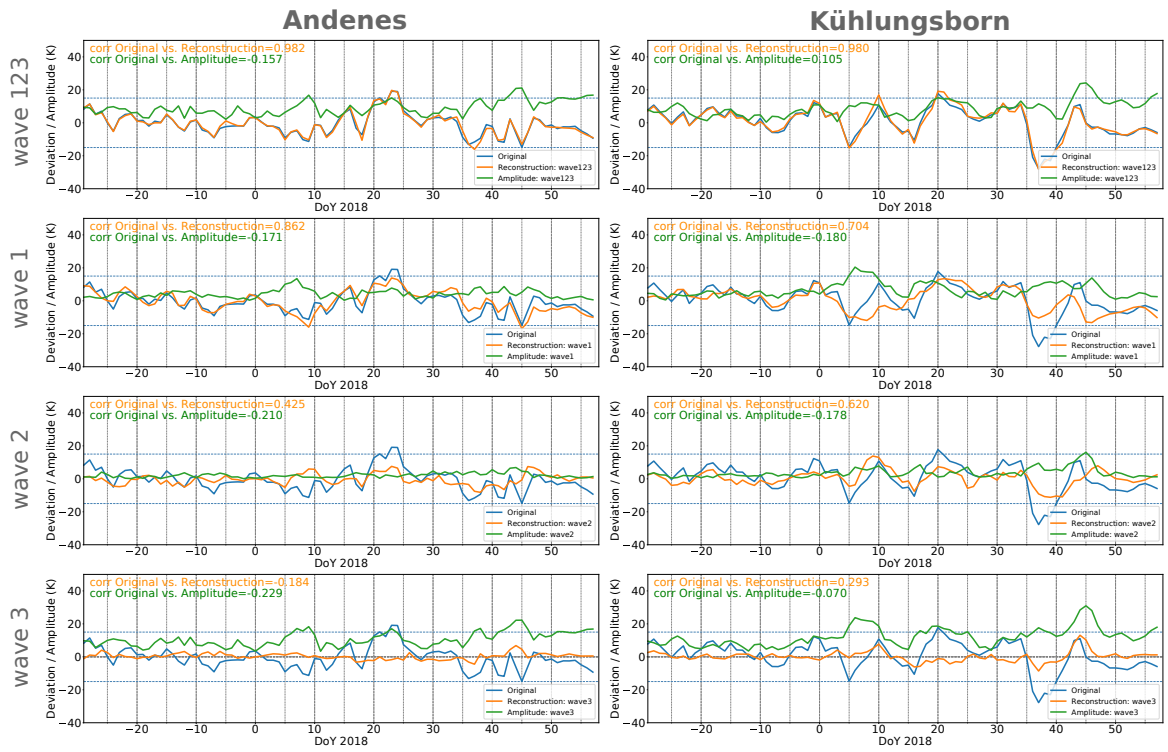

2019

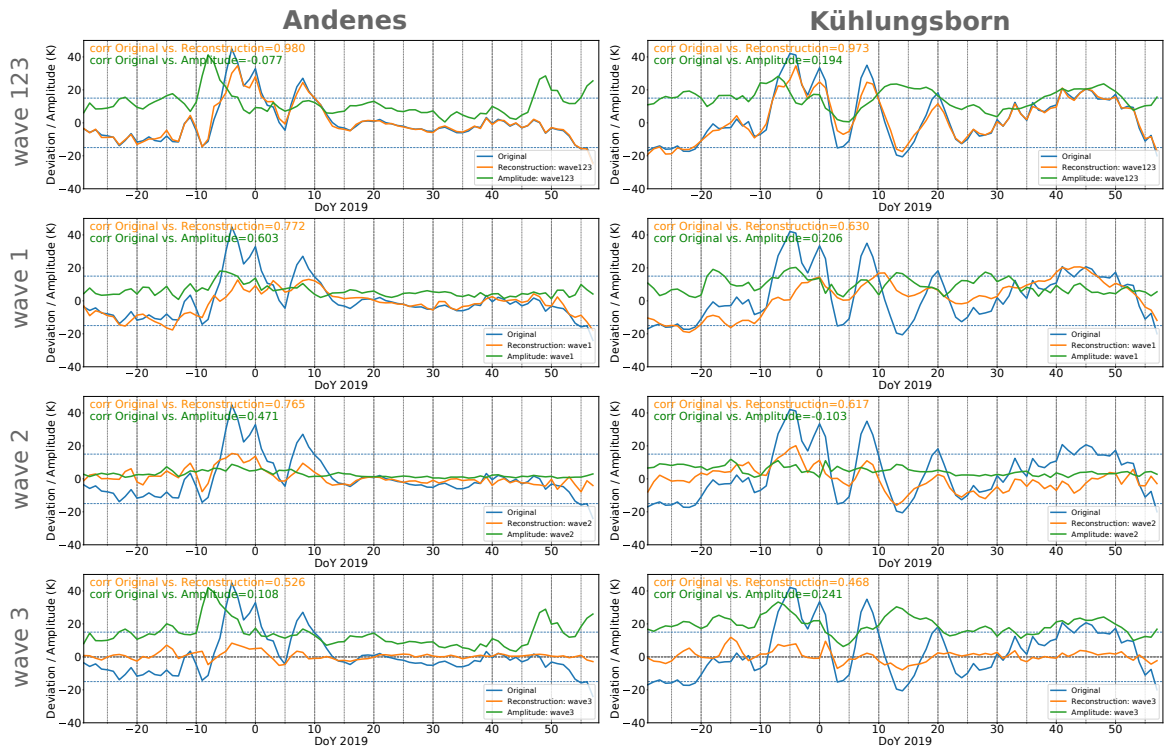

Supplement: Supplementary file 1 [file angeo-2019-117-supplement.pdf]
